# Supplementary material
Source: PubMed Central journal article supplement (PMC8246597)
Supplement: NIHMS1711823-supplement-Source_Data_Figure_4.pdf [file NIHMS1711823-supplement-Source_Data_Figure_4.pdf]

## Supplementary Figure 1

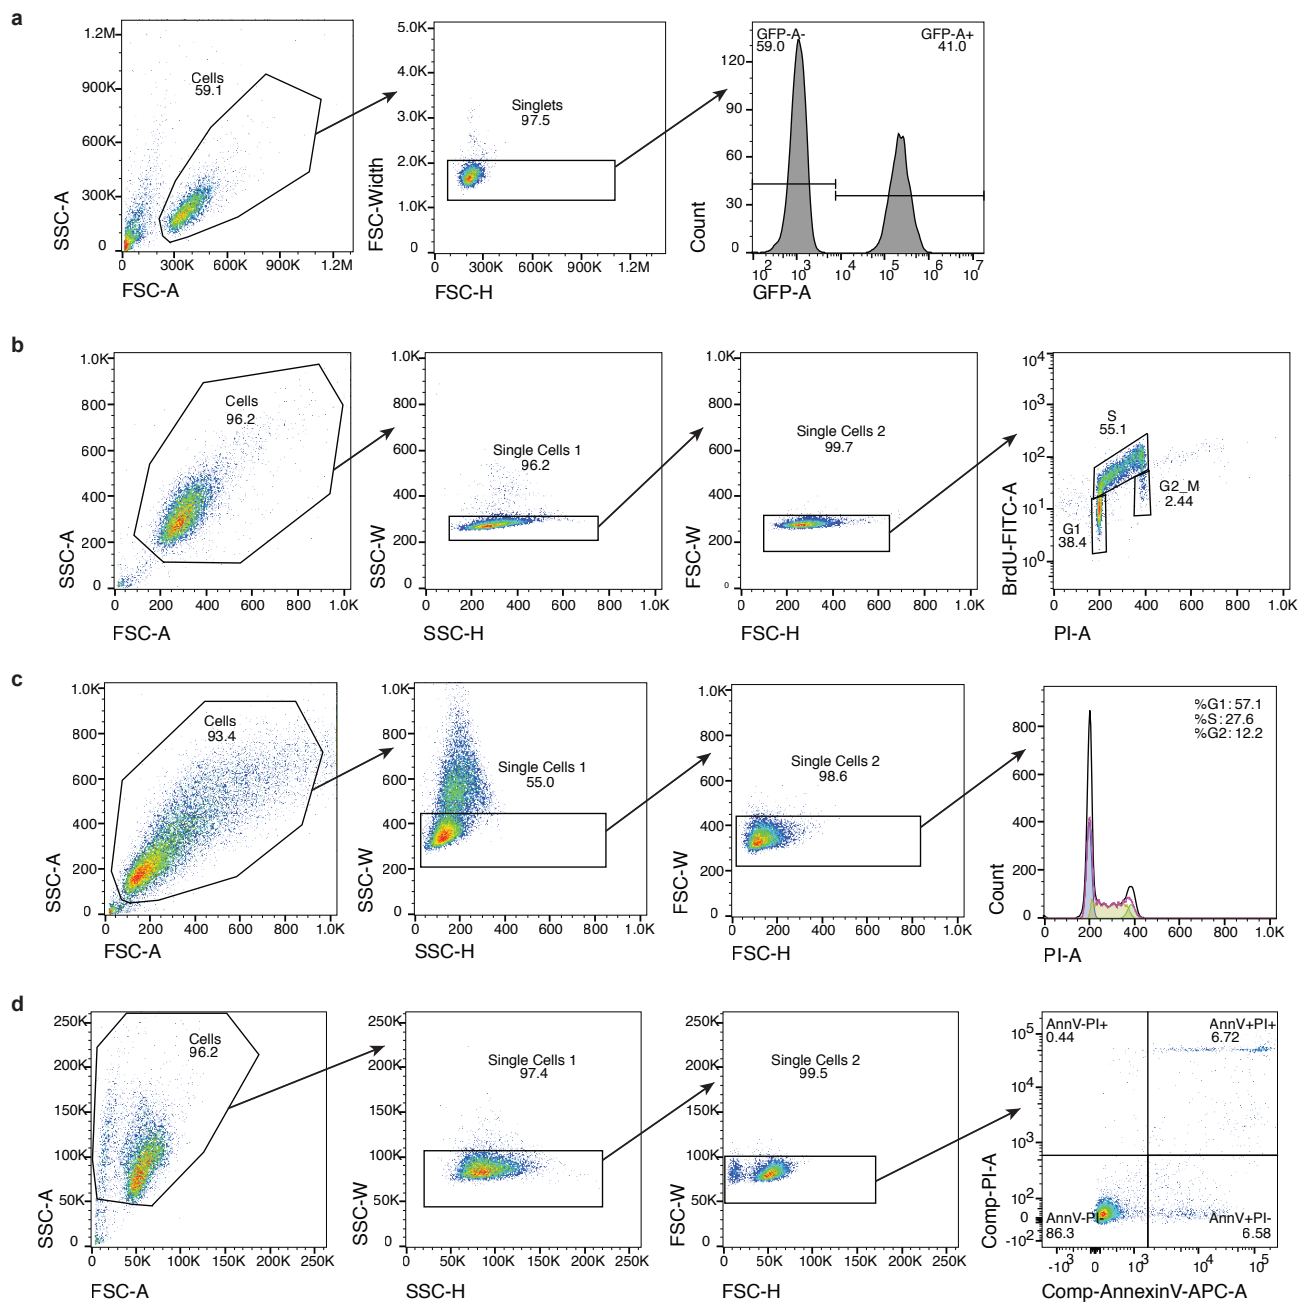

### Supplementary Figure 1. Flow cytometry gating strategies.

**a**, Gating strategy to quantify % of GFP+ cells in competition assays in Extended Data Fig 1h,i. **b**, Gating strategy to quantify the % of cycling S-phase cells by BrdU/PI staining in Fig. 1d,i,j, Extended Data Figs 1l, 4d,e, 5b-d and for U2OS, NCI-H1792, and NCI-H460 cells in Extended Data Fig 1o. **c**, Gating strategy to quantify % of cycling S-phase cells by PI staining for MCF7 cells in Extended Data Fig 1o. Gating of G1, S, and G2 populations were done using the cell cycle analysis function in FlowJo. **d**, Gating strategy to quantify % of apoptotic (AnnexinV+PI+) cells in Extended Data Fig. 1j,k.

# Supplementary Methods

## sg-ID barcodes for Tuba-seq lentiviral vectors

| sgRNA           | sgID     | 20N Barcoding Reverse Primer Sequence (5' -> 3')                                | sgRNA sequence         |
|-----------------|----------|---------------------------------------------------------------------------------|------------------------|
| <i>Ambra1#1</i> | CGATTAGG | AGCTAGTCCGGACGATTAGGGCNNNNNTANNNNNGCNNNNNTANNNNNGCATGCCCAAGAAGAAGAGGAAGGTGTC    | TGACACACCATGGAGTACGG   |
| <i>Ambra1#2</i> | CTTACGGT | AGCTAGTCCGGACTTACGGTGCNNNNNTANNNNNGCNNNNNTANNNNNGCATGCCCAAGAAGAAGAGGAAGGTGTC    | GGGTATAAATGCGTTCCAG    |
| <i>Ambra1#3</i> | CGTCTATG | AGCTAGTCCGGACGTCTATGGCNNNNNTANNNNNGCNNNNNTANNNNNGCATGCCCAAGAAGAAGAGGAAGGTGTC    | GCCAGTAAGAAGGTCGAGCG   |
| <i>Apc#1</i>    | AGGAGTCC | AGCTAGTCCGGAAGGAGTCCGCNNNNNTANNNNNGCNNNNNTANNNNNGCATGCCCAAGAAGAAGAGGAAGGTGTC    | TTGAGCGTAGTTCACTCCG    |
|                 | GAGAACTC | AGCTAGTCCGGAGAGAAGTCCGCNNNNNTANNNNNGCNNNNNTANNNNNGCATGCCCAAGAAGAAGAGGAAGGTGTC   | TACGTTCCAGAAATCCACGGGA |
| <i>Rb1#1</i>    | TCATGAGC | AGCTAGTCCGGATCATGAGCGCNNNNNTANNNNNGCNNNNNTANNNNNGCATGCCCAAGAAGAAGAGGAAGGTGTC    | TCTTACCAGGATCCATCCA    |
| <i>Neo#1</i>    | CTAGGCTA | AGCTAGTCCGGACTAGGCTAGCNCNNNNNTANNNNNGCNNNNNTANNNNNGCATGCCCAAGAAGAAGAGGAAGGTGTC  | TCATGGCTGATGCAATGCGG   |
| <i>Neo#2</i>    | AATGCTGG | AGCTAGTCCGGAAATGCTGGGCNNNNNTANNNNNGCNNNNNTANNNNNGCATGCCCAAGAAGAAGAGGAAGGTGTC    | GATATTGCTGAAGAGCTTGG   |
| <i>Neo#3</i>    | ACGCATAC | AGCTAGTCCGGAACGCATACGCNNNNNTANNNNNGCNNNNNTANNNNNGCATGCCCAAGAAGAAGAGGAAGGTGTC    | GAATAGCCTCCACCCAAG     |
| <i>NT#1</i>     | AGTTGCTC | AGCTAGTCCGGAAAGTTGCTCGCNCNNNNNTANNNNNGCNNNNNTANNNNNGCATGCCCAAGAAGAAGAGGAAGGTGTC | GCGAGGTATTCGGCTCCGCG   |
| <i>NT#2</i>     | ACGTCGAA | AGCTAGTCCGGAACGTCGAAGCNCNNNNNTANNNNNGCNNNNNTANNNNNGCATGCCCAAGAAGAAGAGGAAGGTGTC  | GACGTAGCCTCCGAAATAT    |
| <i>NT#3</i>     | ACGCTAGA | AGCTAGTCCGGAACGCTAGAGCNCNNNNNTANNNNNGCNNNNNTANNNNNGCATGCCCAAGAAGAAGAGGAAGGTGTC  | GACTGAAATCCAAGGACTGT   |
| <i>Rbm10#1</i>  | ACCTTAGG | AGCTAGTCCGGAAACCTTAGGGCNCNNNNNTANNNNNGCNNNNNTANNNNNGCATGCCCAAGAAGAAGAGGAAGGTGTC | TGGGAACGAAAGCTCACCTG   |
| <i>Rbm10#2</i>  | GCTCACTT | AGCTAGTCCGGAGCTCACTTGCNCNNNNNTANNNNNGCNNNNNTANNNNNGCATGCCCAAGAAGAAGAGGAAGGTGTC  | GTATTTCTGAACAGATCCG    |

## Short-interfering RNA (siRNA) sequences

Dharmacon siGENOME SMARTpool siRNAs

| Catalog Number   | Target                      | Sequence                                                                                 |
|------------------|-----------------------------|------------------------------------------------------------------------------------------|
| D-001206-13-05   | Non-Targeting siRNA Pool #1 | UAGCGACUAAACACAUCAA<br>UAAGGCUAUGAAGAGAUAC<br>AUGUAUUGGCCUGUAUUAG<br>AUGAACGUGAAUUGCUCUA |
| M-003210-05-0005 | <i>CCND1</i>                | GUUCGUGGCCUCUAAGAUG<br>CCGAGAAGCUGUGCAUCUA<br>GAACAGAAGUGCGAGGAGG<br>ACAACUCCUGUCCUACUA  |
| M-029987-01-0005 | <i>AMBRA1</i>               | GAGUAGAACUGCCGGAUAG<br>CCACCCAUGUGAACCAUAA<br>GCGGAGACAUGUCAGUAUC<br>CUGAAUCGUCUGCGUGCUU |
| M-012610-01-0005 | <i>CUL4A</i>                | GGAAGAGACUAAUUGCUUA<br>GAACAGCGAUCGUAUCAA<br>GCAUGUGGAUUCAAAGUUA<br>GAACCCAUAUUUUAGUGA   |
| M-017965-01-0005 | <i>CUL4B</i>                | GCUAUUGGCCGACAUUUGU<br>CAGAAGUCAUUUUUGCUA<br>CAAACGGCCUAGCCAAUC<br>CGGAAAGAGUGCAUCUGUA   |
| M-017673-00-0005 | <i>CUL7</i>                 | AGAAGCAGGUGAACAAUUU<br>GAACUCAACUCGGUGAAUG<br>GAACCUGCCUGCCCUCCUA<br>GAACUCCGCUACAGGGAAU |

# Supplementary Methods

## HPLC methods for ubiquitylated protein analysis

Sample pickup:

Volume [ $\mu$ l] : 2.00

Flow [ $\mu$ l / min] : 20.00

Buffer A: 0.1% formic acid

Buffer B: 90% acetonitrile in 0.1% formic acid

Sample loading:

Volume [ $\mu$ l] : 5.00

Flow [ $\mu$ l / min] : (unspecified)

Max. pressure [Bar] : 850.00

Gradient:

| Time [mm:ss] | Duration [mm:ss] | Flow [nl/min] | Mixture [%B] |
|--------------|------------------|---------------|--------------|
| 00:00        | 00:00            | 300           | 5            |
| 01:00        | 01:00            | 300           | 5            |
| 113:00       | 112:00           | 300           | 30           |
| 114:00       | 01:00            | 300           | 95           |
| 120:00       | 06:00            | 300           | 95           |

Pre -column equilibration:

Volume [ $\mu$ l] : 0.00

Flow [ $\mu$ l / min] : (unspecified)

Max. pressure [Bar] : 250.00

Analytical column equilibration:

Volume [ $\mu$ l] : 8.00

Flow [ $\mu$ l / min] : (unspecified)

Max. pressure [Bar] : 850.00

Auto - sampler wash:

Flush volume [ $\mu$ l] : 100.00

# Supplementary Methods

## Mass spectrometry methods for ubiquitylated proteins analysis

MS Run Time (min): 120.00

Sequence override of method parameters not enabled.

Divert Valve: not used during run

Contact Closure: not used during run

Syringe Pump: not used during run

MS Detector Settings:

Real-time modifications to method disabled

Stepped collision energy not enabled

Additional Microscans:

|      |   |   |
|------|---|---|
| MS2  | 0 | 0 |
| MS3  | 0 | 0 |
| MS4  | 0 | 0 |
| MS5  | 0 | 0 |
| MS6  | 0 | 0 |
| MS7  | 0 | 0 |
| MS8  | 0 | 0 |
| MS9  | 0 | 0 |
| MS10 | 0 | 0 |

Experiment Type: Nth Order Double Play

Tune Method: 092613-NSI-VE-injection-times

Scan Event Details:

1: FTMS + p norm o(200.0-2000.0)  
CV = 0.0V

2: ITMS + c norm Dep Rapid MS/MS Most intense ion from (1)  
Activation Type: CID  
Min. Signal Required: 500.0  
Isolation Width: 2.00  
Normalized Coll. Energy: 35.0  
Default Charge State: 2  
Activation Q: 0.250  
Activation Time: 10.000  
CV = 0.0V

Scan Event 2 repeated for top 20 peaks.

Lock Masses:

|                |            |
|----------------|------------|
| Pos List Name: | N/A        |
| Source:        | API Source |
| Mass List:     | (none)     |
| Neg List Name: | N/A        |
| Source:        | API Source |
| Mass List:     | (none)     |

Data Dependent Settings:

Use separate polarity settings disabled  
Parent Mass List: (none)  
Reject Mass List: (none)  
Neutral Loss Mass List: (none)  
Product Mass List: (none)  
Neutral loss in top: 3  
Product in top: 3  
Most intense if no parent masses found not enabled  
Add/subtract mass not enabled  
FT master scan preview mode enabled  
Charge state screening enabled  
Charge state dependent ETD time not enabled  
Monoisotopic precursor selection enabled  
Charge state rejection enabled  
Unassigned charge states : rejected  
Charge state 1 : rejected  
Charge state 2 : not rejected  
Charge state 3 : not rejected  
Charge states 4+ : not rejected  
Chromatography mode is disabled

Global Data Dependent Settings:

Predict ion injection time enabled  
Use global parent and reject mass lists not enabled  
Exclude parent mass from data dependent selection not enabled  
Exclusion mass width relative to mass  
Exclusion mass width relative to low (ppm): 10.00  
Exclusion mass width relative to high (ppm): 10.00  
Parent mass width by mass  
Parent mass width low: 0.5000  
Parent mass width high: 0.5000  
Reject mass width relative to mass  
Reject mass width relative to low (ppm): 10.00  
Reject mass width relative to high (ppm): 10.00  
Zoom/UltraZoom scan mass width by mass  
Zoom/UltraZoom scan mass width low: 5.00  
Zoom/UltraZoom scan mass width high: 5.00  
FT SIM scan mass width low: 5.00  
FT SIM scan mass width high: 5.00  
Neutral Loss candidates processed by decreasing intensity  
Neutral Loss mass width by mass  
Neutral Loss mass width low: 0.5000  
Neutral Loss mass width high: 0.5000  
Product candidates processed by decreasing intensity  
Product mass width by mass  
Product mass width low: 0.5000  
Product mass width high: 0.5000  
MS mass range: 0.00-1000000.00  
MSn mass range by mass  
MSn mass range: 0.00-1000000.00  
Use m/z values as masses not enabled  
Analog UV data dep. not enabled  
Dynamic exclusion enabled  
Repeat Count: 1  
Repeat Duration: 20.00  
Exclusion List Size: 500  
Exclusion Duration: 20.00  
Exclusion mass width relative to mass  
Exclusion mass width relative to low (ppm): 10.00  
Exclusion mass width relative to high (ppm): 10.00  
Expiration: disabled  
Isotopic data dependence not enabled

Custom Data Dependent Settings:

Not enabled
